# Supplementary material
Source: PubMed Central journal article supplement (PMC2647674)
Supplement: blood-2008-04-152157_1.pdf [file blood-2008-04-152157_1.pdf]

| Gene        | Allele | RAF Pull-Down | p-MEK/ERK | Focus Formation | Colony Assay |
|-------------|--------|---------------|-----------|-----------------|--------------|
| <i>NRAS</i> | G12D   | ***           | ***       | ***             | ***          |
|             | G60E   | *             | *         | **              | ***          |
| <i>KRAS</i> | G12D   | ***           | ***       | ***             | ***          |
|             | V14I   | -             | -         | -               | **           |
|             | T74P   | *             | *         | **              | **           |
|             | A146T  | **            | **        | ***             | ***          |

\*, \*\*, and \*\*\* signify relative activity of each mutant as assessed by each respective assay, with more asterisks indicating increased activity. *KRAS* V14I was only analyzed by colony assay.
